# Supplementary material for: Chemical Mixtures in the EU Population: Composition and Potential Risks
Source: MDPI journal article supplement (doi:10.3390/ijerph19106121), 2022-05-18
Supplement: s1 [file s1]

## Supporting Information

**Table S1.** List of biomarkers, summary percentiles (P50 and P95) of concentrations for the generic chemical mixture derived for adults and children. “n” is the number of data collections contributing to the statistics. Empty cells: data not available or removed after filtering; “<”: value below LOD or LOQ.

| Biomarker                                     | Matrix | Unit        | Adults |               |            |            |               |         |            | Children |               |            |            |               |            |            |
|-----------------------------------------------|--------|-------------|--------|---------------|------------|------------|---------------|---------|------------|----------|---------------|------------|------------|---------------|------------|------------|
|                                               |        |             | n      | P50<br>median | P50<br>min | P50<br>max | P95<br>median | P50 min | P50<br>max | n        | P50<br>median | P50<br>min | P50<br>max | P95<br>median | P50<br>min | P50<br>max |
| <b>Metals and metalloids</b>                  |        |             |        |               |            |            |               |         |            |          |               |            |            |               |            |            |
| As (Total arsenic)                            | Urine  | µg/L        | 5      | 9.80          | 5.63       | 15.40      | 92.06         | 53.34   | 132.7      |          |               |            |            |               |            |            |
| As (Total arsenic)                            | Blood  | µg/L        | 4      | 0.67          | 0.56       | 0.77       | 2.96          | 2.94    | 3.74       |          |               |            |            |               |            |            |
| As(III) (arsenous acid)                       | Urine  | µg/L        | 2      | <             | <          | <          | 0.90          | 0.70    | 1.11       |          |               |            |            |               |            |            |
| As(V) (arsenic acid)                          | Urine  | µg/L        | 2      | <             | <          | 0.20       | 0.63          | 0.60    | 0.67       |          |               |            |            |               |            |            |
| AsB (arsenobetaine)                           | Urine  | µg/L        | 2      | 2.91          | 2.61       | 3.20       | 63.65         | 63.42   | 63.88      |          |               |            |            |               |            |            |
| Σ(As(III) + As(V) + DMA + MMA)                | Urine  | µg/L        | 2      | 4.15          | 4.05       | 4.25       | 12.61         | 10.50   | 14.73      |          |               |            |            |               |            |            |
| Toxicologically relevant arsenic <sup>a</sup> | Urine  | µg/L        | 3      | 5.70          | 4.70       | 5.75       | 14.75         | 12.52   | 18.46      |          |               |            |            |               |            |            |
| DMA (dimethylarsinic)                         | Urine  | µg/L        | 2      | 3.12          | 2.90       | 3.34       | 10.82         | 9.20    | 12.44      |          |               |            |            |               |            |            |
| Cd (cadmium)                                  | Urine  | µg/L        | 24     | 0.23          | 0.08       | 0.48       | 0.66          | 0.31    | 1.53       | 13       | 0.11          | <          | 0.3        | 0.302         | 0.08       | 0.9        |
| Cd (cadmium)                                  | Urine  | µg/g<br>crt | 24     | 0.21          | 0.07       | 0.41       | 0.55          | 0.18    | 1.26       | 13       | 0.12          | <          | 0.22       | 0.24          | 0.09       | 0.60       |
| Cd (cadmium)                                  | Blood  | µg/L        | 8      | 0.32          | 0.17       | 0.54       | 1.35          | 0.66    | 2.15       | 2        | 0.31          | 0.30       | 0.32       | 0.64          | 0.60       | 0.68       |
| Cr (total chromium)                           | Urine  | µg/L        | 3      | 0.38          | <          | 0.38       | 0.54          | 0.40    | 1.39       |          |               |            |            |               |            |            |
| Cr (total chromium)                           | Blood  | µg/L        | 2      | 0.45          | 0.25       | 0.65       | 1.53          | 0.61    | 2.45       |          |               |            |            |               |            |            |
| Hg (Mercury (total))                          | Urine  | µg/L        | 6      | 0.73          | 0.22       | 1.29       | 4.79          | 0.91    | 9.28       | 2        | 0.24          | 0.23       | 0.26       | 1.22          | 1.14       | 1.30       |
| Hg (Mercury (total))                          | Blood  | µg/L        | 5      | 0.86          | 0.65       | 6.53       | 2.63          | 2.49    | 18.40      | 2        | 0.34          | 0.33       | 0.34       | 1.17          | 1.01       | 1.32       |
| Pb (Lead)                                     | Urine  | µg/L        | 4      | 0.92          | 0.49       | 7.40       | 2.68          | 1.54    | 16.61      | 1        | 6.20          |            |            | 16.40         |            |            |
| Pb (Lead)                                     | Blood  | µg/L        | 8      | 16.96         | 9.02       | 28.95      | 45.06         | 18.39   | 62.64      | 2        | 16.21         | 12.42      | 20.00      | 31.30         | 25.00      | 37.60      |
| <b>PAHs</b>                                   |        |             |        |               |            |            |               |         |            |          |               |            |            |               |            |            |
| 1-NAPH (1-hydroxynaphthalene)                 | Urine  | µg/L        | 1      | 0.88          |            |            | 7.28          |         |            | 1        | 0.74          |            |            | 4.74          |            |            |
| 1-PHEN (1-hydroxyphenanthrene)                | Urine  | µg/L        | 1      | 0.15          |            |            | 0.52          |         |            | 1        | 0.15          |            |            | 0.53          |            |            |

|                                                                                                                          |       |      |    |       |      |       |       |       |       |    |       |       |       |       |       |       |
|--------------------------------------------------------------------------------------------------------------------------|-------|------|----|-------|------|-------|-------|-------|-------|----|-------|-------|-------|-------|-------|-------|
| 1-PYR (1-hydroxypyrene)                                                                                                  | Urine | µg/L | 6  | 0.12  | 0.10 | 0.19  | 0.41  | 0.36  | 0.98  | 1  | 0.10  |       |       | 0.32  |       |       |
| 2-FLUO (2-hydroxyfluorene)                                                                                               | Urine | µg/L | 1  | 0.49  |      |       | 1.98  |       |       | 1  | 0.47  |       |       | 1.82  |       |       |
| 2-NAPH (2-hydroxynaphthalene)                                                                                            | Urine | µg/L | 1  | 4.26  |      |       | 23.17 |       |       | 1  | 3.38  |       |       | 21.02 |       |       |
| 2-PHEN (2-hydroxyphenanthrene)                                                                                           | Urine | µg/L | 1  | 0.10  |      |       | 0.33  |       |       | 1  | 0.08  |       |       | 0.26  |       |       |
| 3-PHEN (3-hydroxyphenanthrene)                                                                                           | Urine | µg/L | 1  | 0.14  |      |       | 0.44  |       |       | 1  | 0.13  |       |       | 0.40  |       |       |
| 4-PHEN (4-hydroxyphenanthrene)                                                                                           | Urine | µg/L | 2  | <     | <    | 0.05  | 0.72  | 0.28  | 1.17  | 1  | 0.05  |       |       | 0.36  |       |       |
| 9-PHEN (9-hydroxyphenanthrene)                                                                                           | Urine | µg/L | 1  | 0.06  |      |       | 0.24  |       |       | 1  | 0.06  |       |       | 0.42  |       |       |
| Σ(1-hydroxyphenanthrene + 2-hydroxyphenanthrene + 3-hydroxyphenanthrene + 4-hydroxyphenanthrene + 9-hydroxyphenanthrene) | Urine | µg/L | 1  | 0.22  |      |       | 1.67  |       |       |    |       |       |       |       |       |       |
| <b>Phthalates</b>                                                                                                        |       |      |    |       |      |       |       |       |       |    |       |       |       |       |       |       |
| 2cx-MMHTP (1-mono-(2-carboxyl-methyl-hexyl) benzene-1,4-dicarboxylate)                                                   | Urine | µg/L | 1  | <     |      |       | 0.58  |       |       | 1  | <     |       |       | 1.38  |       |       |
| 3cx-MPP (3-carboxyl-mono-propyl phthalate)                                                                               | Urine | µg/L | 4  | 2.58  | 0.74 | 33.92 | 8.57  | 3.32  | 136.4 | 4  | 4.67  | 1.51  | 33.42 | 35.74 | 6.20  | 104.9 |
| 5cx-MEPP, MECPP (Mono(2-ethyl-5-carboxy- pentyl) phthalate)                                                              | Urine | µg/L | 8  | 12.17 | 8.23 | 55.19 | 45.88 | 30.21 | 204.0 | 8  | 24.23 | 14.40 | 58.52 | 76.59 | 53.40 | 179.5 |
| 5cx-MEPTP (1-mono-(2-ethyl-5-carboxyl-pentyl) benzene-1,4-dicarboxylate)                                                 | Urine | µg/L | 1  | 4.85  |      |       | 30.29 |       |       | 1  | 11.01 |       |       | 70.01 |       |       |
| 5OH-MEHP, MEHHP (Mono(2-ethyl-5-hydroxy- hexyl) phthalate)                                                               | Urine | µg/L | 23 | 13.20 | 2.24 | 49.03 | 50.60 | 16.62 | 174.6 | 17 | 22.76 | 5.15  | 54.63 | 88.55 | 27.53 | 159.1 |
| 5OH-MEHTP (1-mono-(2-ethyl-5-hydroxy-hexyl) benzene-1,4-dicarboxylate)                                                   | Urine | µg/L | 1  | 0.34  |      |       | 2.79  |       |       | 1  | 0.79  |       |       | 6.38  |       |       |
| 5oxo-MEHP, MEOHP (Mono(2-ethyl-5-oxo-hexyl) phthalate)                                                                   | Urine | µg/L | 23 | 8.44  | 1.48 | 27.50 | 34.60 | 11.25 | 126.5 | 17 | 15.22 | 3.71  | 35.11 | 49.89 | 19.69 | 101.9 |
| 5oxo-MEHTP (1-mono-(2-ethyl-5-oxo-hexyl) benzene-1,4-dicarboxylate)                                                      | Urine | µg/L | 1  | 0.34  |      |       | 2.44  |       |       | 1  | 0.84  |       |       | 5.67  |       |       |
| cx-MiDP, MCNP (Mono(2,7-methyl-7-carboxy-heptyl) phthalate)                                                              | Urine | µg/L | 3  | 0.58  | 0.57 | 0.80  | 2.70  | 2.50  | 3.70  | 2  | 1.04  | 1.00  | 1.09  | 3.75  | 3.46  | 4.05  |
| cx-MiNP, MCOP, MCiOP (7-Carboxy-(mono-methyl- heptyl) phthalate)                                                         | Urine | µg/L | 9  | 6.22  | 3.47 | 14.58 | 33.61 | 13.66 | 304.5 | 8  | 7.80  | 4.34  | 19.91 | 41.83 | 14.13 | 182.7 |

|                                                                                            |       |      |    |       |       |       |       |       |       |    |       |       |       |       |       |       |
|--------------------------------------------------------------------------------------------|-------|------|----|-------|-------|-------|-------|-------|-------|----|-------|-------|-------|-------|-------|-------|
| cx-MPHP (Mono(2,7-methyl-7-carboxy-heptyl) phthalate)                                      | Urine | µg/L | 1  | <     |       |       | <     |       |       | 1  | <     |       |       | <     |       |       |
| MBzP (Mono-benzyl phthalate)                                                               | Urine | µg/L | 22 | 5.06  | <     | 32.06 | 21.84 | 7.14  | 180.9 | 17 | 7.37  | 2.68  | 32.26 | 34.00 | 15.87 | 155.0 |
| MCHP (Mono-cyclo-hexyl phthalate)                                                          | Urine | µg/L | 8  | <     | <     | 0.10  | <     | <     | 6.32  | 7  | <     | <     | 0.10  | 0.31  | <     | 0.31  |
| MEHP (Mono(2-ethylhexyl) phthalate)                                                        | Urine | µg/L | 23 | 2.70  | <     | 7.21  | 12.70 | 5.36  | 32.25 | 16 | 2.62  | 0.00  | 6.60  | 10.71 | 4.71  | 22.23 |
| MEP (Mono-ethyl phthalate)                                                                 | Urine | µg/L | 19 | 34.00 | 18.66 | 174.0 | 351.3 | 122.2 | 1666  | 15 | 24.40 | 16.93 | 169.2 | 148.5 | 67.83 | 1026  |
| MiBP (Mono-isobutyl phthalate)                                                             | Urine | µg/L | 15 | 28.01 | 11.97 | 55.50 | 106.4 | 53.68 | 298.6 | 12 | 45.54 | 28.65 | 104.0 | 185.4 | 113.7 | 355.6 |
| MiDP (Mono-propyl-heptyl phthalate)                                                        | Urine | µg/L | 2  | <     | <     | <     | <     | <     | <     | 1  | <     |       |       | <     |       |       |
| MiNP (Mono-methyl-octyl phthalate)                                                         | Urine | µg/L | 3  | <     | <     | <     | 1.92  | 0.94  | 6.06  | 2  | <     | <     | <     | 3.73  | 3.17  | 4.30  |
| MMA (monomethylarsonic)                                                                    | Urine | µg/L | 2  | 0.48  | 0.36  | 0.60  | 1.42  | 1.13  | 1.70  |    |       |       |       |       |       |       |
| MMP (Mono-methyl phthalate)                                                                | Urine | µg/L | 8  | <     | <     | 6.30  | 15.80 | 7.29  | 137.6 | 6  | <     | <     | 6.75  | 40.92 | 14.30 | 56.51 |
| MnBP (Mono-n-butyl phthalate)                                                              | Urine | µg/L | 18 | 23.50 | 9.84  | 50.13 | 86.72 | 46.66 | 202.7 | 12 | 38.90 | 12.84 | 82.50 | 130.1 | 43.98 | 271.  |
| MnHxP (Mono-n-hexyl phthalate (suspected))                                                 | Urine | µg/L | 1  | 0.08  |       |       | 0.66  |       |       |    |       |       |       |       |       |       |
| MnOP, MOP (Mono-n-octyl phthalate)                                                         | Urine | µg/L | 7  | <     | <     | 0.10  | <     | <     | 0.17  | 6  | <     | <     | 0.10  | <     | <     | 0.33  |
| MnPeP (Mono-n-pentyl phthalate)                                                            | Urine | µg/L | 6  | <     | <     | <     | <     | <     | 0.20  | 4  | <     | <     | <     | <     | <     | 0.39  |
| OH-MiBP (2-OH-Mono-iso-butylphthalate)                                                     | Urine | µg/L | 3  | 7.25  | 4.89  | 16.02 | 28.69 | 21.25 | 76.01 | 3  | 15.76 | 10.28 | 16.10 | 63.78 | 39.60 | 75.90 |
| OH-MiDP (6-OH-Mono-propyl-heptyl phthalate)                                                | Urine | µg/L | 3  | 1.30  | 0.46  | 1.57  | 5.02  | 3.85  | 7.02  | 3  | 1.65  | 1.48  | 2.27  | 8.25  | 6.27  | 10.56 |
| OH-MiNP, MHNP, MHiNP (7-OH-(Mono-methyl-octyl) phthalate)                                  | Urine | µg/L | 8  | 4.86  | 1.49  | 12.39 | 21.00 | 10.26 | 125.0 | 7  | 8.03  | 4.25  | 12.52 | 36.97 | 17.30 | 52.32 |
| OH-MnBP (3-OH-Mono-n-butyl phthalate)                                                      | Urine | µg/L | 3  | 1.85  | 1.81  | 6.59  | 7.65  | 7.39  | 27.73 | 3  | 3.30  | 3.00  | 7.43  | 19.24 | 10.40 | 29.92 |
| OH-MPHP (6-OH-Mono-propyl-heptyl phthalate)                                                | Urine | µg/L | 1  | <     |       |       | 1.28  |       |       | 1  | 0.32  |       |       | 2.05  |       |       |
| oxo-MiDP (6-Oxo-Mono-propyl-heptyl phthalate)                                              | Urine | µg/L | 3  | 0.50  | 0.30  | 0.72  | 2.60  | 1.62  | 3.11  | 3  | 0.54  | 0.47  | 0.65  | 2.96  | 2.30  | 3.52  |
| oxo-MiNP, MONP, MOiNP (7-Oxo-(Mono-methyl-octyl) phthalate)                                | Urine | µg/L | 8  | 2.14  | 1.01  | 6.50  | 14.67 | 6.93  | 57.07 | 7  | 3.00  | 2.44  | 6.09  | 16.68 | 10.43 | 40.81 |
| oxo-MPHP (6-Oxo-Mono-propyl-heptyl phthalate)                                              | Urine | µg/L | 1  | 0.30  |       |       | 1.65  |       |       | 1  | 0.34  |       |       | 2.62  |       |       |
| <b>Other plasticisers</b>                                                                  |       |      |    |       |       |       |       |       |       |    |       |       |       |       |       |       |
| cx-MINCH, MCOCH (cyclohexane-1,2-dicarboxylate-mono-(7- carboxylate-4-methyl)heptyl ester) | Urine | µg/L | 2  | 0.61  | 0.42  | 1.09  | 10.25 | 4.64  | 15.86 | 1  | 1.60  |       |       | 9.28  |       |       |

|                                                                                       |       |      |   |      |      |       |       |      |       |   |      |      |      |       |      |       |
|---------------------------------------------------------------------------------------|-------|------|---|------|------|-------|-------|------|-------|---|------|------|------|-------|------|-------|
| OH-MINCH, MHNCH (cyclohexane-1,2-dicarboxylate-mono-(7- hydroxy-4-methyl)octyl ester) | Urine | µg/L | 3 | 1.03 | 0.32 | 2.14  | 10.70 | 6.91 | 27.69 | 1 | 3.21 |      |      | 19.10 |      |       |
| oxo-MINCH, MONCH (cyclohexane-1,2-dicarboxylate-mono-(7-oxo- 4-methyl)octyl ester)    | Urine | µg/L | 2 | 0.50 | 0.31 | 0.95  | 5.82  | 5.28 | 8.06  | 1 | 1.41 |      |      | 9.02  |      |       |
| <b>PFAS</b>                                                                           |       |      |   |      |      |       |       |      |       |   |      |      |      |       |      |       |
| FOSA (Perfluoro-1- octaperfluoro-1-octanesulphonamide)                                | Blood | µg/L | 2 | <    | <    | <     | <     | <    | <     |   |      |      |      |       |      |       |
| N-EtFOSA (N-Ethylperfluoro-1-octanesulphonamide)                                      | Blood | µg/L | 1 | <    |      |       | <     |      |       |   |      |      |      |       |      |       |
| N-MeFOSA (N-Methylperfluoro-1 octanesulphonamide)                                     | Blood | µg/L | 2 | <    | <    | <     | <     | <    | <     |   |      |      |      |       |      |       |
| PFBA (Perfluorobutanoic acid)                                                         | Blood | µg/L | 2 | <    | <    | <     | <     | <    | <     | 1 | <    |      |      | <     |      |       |
| PFBS (Perfluorobutane sulfonic acid)                                                  | Blood | µg/L | 4 | <    | <    | <     | <     | <    | 0.01  | 1 | <    |      |      | <     |      |       |
| PFDA (Perfluorodecanoic acid)                                                         | Blood | µg/L | 6 | 0.27 | <    | 0.35  | 0.48  | 0.33 | 0.98  | 2 | <    | <    | 0.32 | 0.46  | 0.36 | 0.55  |
| PFDoDA (Perfluorododecanoic acid)                                                     | Blood | µg/L | 3 | <    | <    | <     | 0.06  | <    | 0.06  | 1 | <    |      |      | <     |      |       |
| PFDS (Perfluorodecane sulfonic acid)                                                  | Blood | µg/L | 1 | <    |      |       | <     |      |       |   |      |      |      |       |      |       |
| PFHpA (Perfluoroheptanoic acid)                                                       | Blood | µg/L | 3 | <    | <    | <     | 0.06  | <    | 0.06  | 1 | <    |      |      | <     |      |       |
| PFHxA (Perfluorohexanoic acid)                                                        | Blood | µg/L | 3 | <    | <    | <     | <     | <    | 0.04  | 1 | <    |      |      | <     |      |       |
| PFHxS (Perfluorohexane sulfonic acid)                                                 | Blood | µg/L | 7 | 0.32 | 0.18 | 1.61  | 1.00  | 0.54 | 4.46  | 2 | 0.35 | 0.34 | 0.37 | 1.17  | 0.99 | 1.34  |
| PFNA (Perfluorononanoic acid)                                                         | Blood | µg/L | 7 | 0.66 | <    | 0.90  | 1.36  | 0.66 | 2.11  | 2 | <    | <    | 0.82 | 1.18  | 0.75 | 1.61  |
| PFOA (Perfluorooctanoic acid)                                                         | Blood | µg/L | 8 | 1.62 | 0.76 | 3.50  | 3.68  | 2.85 | 6.31  | 2 | 2.20 | 1.37 | 3.02 | 4.30  | 3.38 | 5.22  |
| PFOS (Perfluorooctane sulfonic acid)                                                  | Blood | µg/L | 8 | 6.26 | 2.43 | 12.60 | 14.21 | 5.88 | 31.20 | 2 | 4.07 | 2.28 | 5.87 | 8.43  | 5.62 | 11.23 |
| PFPeA (Perfluoropentanoic acid)                                                       | Blood | µg/L | 2 | <    | <    | <     | <     | <    | <     | 1 | <    |      |      | <     |      |       |
| PFTeDA (Perfluorotetradecanoic acid)                                                  | Blood | µg/L | 1 | <    |      |       | <     |      |       |   |      |      |      |       |      |       |
| PFTTrDA (Perfluorotridecanoic acid)                                                   | Blood | µg/L | 2 | <    | <    | <     | 0.04  | 0.03 | 0.05  |   |      |      |      |       |      |       |
| PFUnDA (Perfluoroundecanoic acid)                                                     | Blood | µg/L | 3 | 0.07 | <    | 0.07  | 0.19  | <    | 0.19  | 1 | <    |      |      | <     |      |       |
| <b>Flame retardants</b>                                                               |       |      |   |      |      |       |       |      |       |   |      |      |      |       |      |       |
| Anti-DP (Anti-dechlorane plus)                                                        | Blood | µg/L | 1 | <    |      |       | 0.03  |      |       |   |      |      |      |       |      |       |
| BBOEP (bis(2-butoxyethyl) phosphate)                                                  | Urine | µg/L | 1 | <    |      |       | <     |      |       |   |      |      |      |       |      |       |
| BCEP (Bis(2-chloroethyl) phosphate)                                                   | Urine | µg/L | 1 | <    |      |       | 5.06  |      |       | 1 | 0.14 |      |      | 0.96  |      |       |
| BCIPP (bis(1-chloro-2-propyl) phosphate)                                              | Urine | µg/L |   |      |      |       |       |      |       | 1 | 0.11 |      |      | 0.74  |      |       |

|                                               |       |            |   |      |   |       |      |      |       |   |       |  |  |       |  |  |
|-----------------------------------------------|-------|------------|---|------|---|-------|------|------|-------|---|-------|--|--|-------|--|--|
| BDCIPP (Bis(1,3-dichloro-2-propyl) phosphate) | Urine | µg/L       | 1 | <    |   |       | 0.59 |      |       | 1 | 0.70  |  |  | 3.09  |  |  |
| BDE-100 (Polybrominated diphenylether 100)    | Blood | µg/L       | 6 | <    | < | 0.003 | <    | <    | 0.01  | 1 | 0.003 |  |  | 0.01  |  |  |
| BDE-153 (Polybrominated diphenylether 153)    | Blood | µg/L       | 6 | 0.01 | < | 0.01  | 0.01 | 0.01 | 0.02  | 1 | 0.01  |  |  | 0.02  |  |  |
| BDE-154 (Polybrominated diphenylether 154)    | Blood | µg/L       | 6 | <    | < | <     | <    | <    | 0.004 | 1 | <     |  |  | 0.003 |  |  |
| BDE-183 (Polybrominated diphenylether 183)    | Blood | µg/L       | 6 | <    | < | <     | <    | <    | <     | 1 | <     |  |  | <     |  |  |
| BDE-209 (Polybrominated diphenylether 209)    | Blood | µg/L       | 2 | <    | < | <     | 0.09 | 0.05 | 0.13  |   |       |  |  |       |  |  |
| BDE-28 (Polybrominated diphenylether 28)      | Blood | µg/L       | 7 | <    | < | 4.50  | <    | <    | 10.00 | 1 | 0.001 |  |  | 0.002 |  |  |
| BDE-47 (Polybrominated diphenylether 47)      | Blood | µg/L       | 6 | <    | < | 0.01  | 0.01 | <    | 0.04  | 1 | 0.01  |  |  | 0.05  |  |  |
| BDE-66 (Polybrominated diphenylether 66)      | Blood | µg/L       | 1 | <    |   |       | <    |      |       |   |       |  |  |       |  |  |
| BDE-99 (Polybrominated diphenylether 99)      | Blood | µg/L       | 6 | <    | < | 0.01  | <    | <    | 0.04  | 1 | 0.01  |  |  | 0.03  |  |  |
| BDE-99 (Polybrominated diphenylether 99)      | Blood | µg/g lipid | 5 | <    | < | 0.001 | 0.01 | <    | 0.01  | 1 | 0.001 |  |  | 0.01  |  |  |
| BTBPE (1,2 bis(2,4,6-tribromophenoxy)ethane)  | Blood | µg/L       | 2 | <    | < | <     | <    | <    | <     |   |       |  |  |       |  |  |
| DBDPE (Decabromodiphenylethane)               | Blood | µg/L       | 1 | <    |   |       | <    |      |       |   |       |  |  |       |  |  |
| Dec602 (Dechlorane 602)                       | Blood | µg/L       | 1 | <    |   |       | <    |      |       |   |       |  |  |       |  |  |
| Dec603 (Dechlorane 603)                       | Blood | µg/L       | 1 | <    |   |       | <    |      |       |   |       |  |  |       |  |  |
| HBB (Hexabromobenzene)                        | Blood | µg/L       | 2 | <    | < | <     | <    | <    | 0.001 |   |       |  |  |       |  |  |
| HBCDα (Hexabromocyclododecane alpha)          | Blood | µg/L       | 1 | <    |   |       | <    |      |       |   |       |  |  |       |  |  |
| HBCDβ (Hexabromocyclododecane beta)           | Blood | µg/L       | 1 | <    |   |       | <    |      |       |   |       |  |  |       |  |  |
| HBCDγ (Hexabromocyclododecane gamma)          | Blood | µg/L       | 1 | <    |   |       | <    |      |       |   |       |  |  |       |  |  |
| OBIND (Octabromotrimethylphenylindane)        | Blood | µg/L       | 1 | <    |   |       | <    |      |       |   |       |  |  |       |  |  |
| PBEB (Pentabromoethylbenzene)                 | Blood | µg/L       | 1 | <    |   |       | <    |      |       |   |       |  |  |       |  |  |
| PBT (Pentabromotoluene)                       | Blood | µg/L       | 1 | <    |   |       | <    |      |       |   |       |  |  |       |  |  |

|                                                                                 |       |      |    |      |      |      |       |       |        |    |      |   |      |       |      |       |
|---------------------------------------------------------------------------------|-------|------|----|------|------|------|-------|-------|--------|----|------|---|------|-------|------|-------|
| Syn-DP (Syn-dechlorane plus)                                                    | Blood | µg/L | 1  | <    |      |      | 0.01  |       |        |    |      |   |      |       |      |       |
| TBBPA (Tetrabromobisphenol A)                                                   | Blood | µg/L | 2  | <    | <    | <    | <     | <     | 0.02   |    |      |   |      |       |      |       |
| total HBCD (total Hexabromocyclododecane)                                       | Blood | µg/L | 1  | <    |      |      | <     |       |        |    |      |   |      |       |      |       |
| <b>Bisphenols</b>                                                               |       |      |    |      |      |      |       |       |        |    |      |   |      |       |      |       |
| BPA free/unconjugated (Bisphenol A unconjugated)                                | Urine | µg/L | 1  | <    |      |      | 0.67  |       |        | 1  | <    |   |      | 1.40  |      |       |
| BPA total (Bisphenol A)                                                         | Urine | µg/L | 15 | 2.09 | <    | 3.59 | 9.50  | 1.41  | 17.62  | 10 | 2.09 | < | 3.67 | 8.98  | 3.87 | 17.73 |
| BPF total (Bisphenol F)                                                         | Urine | µg/L | 2  | <    | <    | 0.28 | 4.08  | <     | 6.07   |    |      |   |      |       |      |       |
| BPS total (Bisphenol S)                                                         | Urine | µg/L | 2  | <    | <    | 0.11 | <     | <     | 1.64   |    |      |   |      |       |      |       |
| <b>Pesticides</b>                                                               |       |      |    |      |      |      |       |       |        |    |      |   |      |       |      |       |
| 2,5-DCP (2,5-dichlorophenol)                                                    | Urine | µg/L | 3  | 1.50 | <    | 1.50 | 3.49  | 1.92  | 13.10  | 1  | 0.44 |   |      | 2.35  |      |       |
| AMPA (Aminomethylphosphonic acid)                                               | Urine | µg/L | 1  | 0.10 |      |      | 0.42  |       |        |    |      |   |      |       |      |       |
| DEDTP (Diethyldithiophosphate)                                                  | Urine | µg/L | 7  | <    | <    | <    | <     | <     | 2.10   | 1  | <    |   |      | <     |      |       |
| DEP (Diethyl phosphate)                                                         | Urine | µg/L | 7  | 2.45 | <    | 3.96 | 10.56 | 5.12  | 18.90  | 1  | 4.76 |   |      | 19.21 |      |       |
| DETP (Diethyl thiophosphate)                                                    | Urine | µg/L | 7  | <    | <    | <    | 5.20  | 2.98  | 9.88   | 1  | <    |   |      | 5.15  |      |       |
| DMDTP (Dimethyl dithiophosphate)                                                | Urine | µg/L | 7  | <    | <    | <    | 54.50 | <     | 54.50  | 1  | <    |   |      | <     |      |       |
| DMP (Dimethyl phosphate)                                                        | Urine | µg/L | 7  | <    | <    | 5.25 | 15.51 | 2.69  | 132.47 | 1  | <    |   |      | 24.97 |      |       |
| DMTP (Dimethyl thiophosphate)                                                   | Urine | µg/L | 6  | 3.04 | 1.11 | 6.00 | 21.37 | 14.52 | 37.97  | 1  | 3.19 |   |      | 22.99 |      |       |
| DnBP (Di-n-butyl phosphate)                                                     | Urine | µg/L | 2  | <    | <    | <    | <     | <     | <      |    |      |   |      |       |      |       |
| DPHP (Diphenyl phosphate)                                                       | Urine | µg/L | 2  | <    | <    | 1.19 | 7.55  | 3.10  | 12.00  | 1  | 1.74 |   |      | 7.44  |      |       |
| glyphosate                                                                      | Urine | µg/L | 1  | <    |      |      | 0.33  |       |        |    |      |   |      |       |      |       |
| TCPy (3,5,6-trichloro-2-pyridinol)                                              | Urine | µg/L | 2  | 1.95 | 1.71 | 2.20 | 9.94  | 8.05  | 11.83  |    |      |   |      |       |      |       |
| <b>Pyrethroid insecticides</b>                                                  |       |      |    |      |      |      |       |       |        |    |      |   |      |       |      |       |
| 3-PBA (3-phenoxybenzoic acid)                                                   | Urine | µg/L | 2  | 0.34 | 0.19 | 0.48 | 2.44  | 2.16  | 2.72   |    |      |   |      |       |      |       |
| cis-DBCA (cis-3-(2,2-dibromovinyl)-2,2-dimethylcyclopropane-1-carboxylic acid)  | Urine | µg/L | 2  | <    | <    | <    | <     | <     | 1.41   |    |      |   |      |       |      |       |
| cis-DCCA (cis-3-(2,2-dichlorovinyl)-2,2-dimethylcyclopropane-1-carboxylic acid) | Urine | µg/L | 2  | <    | <    | <    | <     | <     | 6.26   |    |      |   |      |       |      |       |
| F-3-PBA (4-fluoro-3-phenoxybenzoic acid)                                        | Urine | µg/L | 1  | <    |      |      | <     |       |        |    |      |   |      |       |      |       |

|                                                                                     |       |      |   |       |      |      |        |       |       |   |       |   |      |       |      |       |
|-------------------------------------------------------------------------------------|-------|------|---|-------|------|------|--------|-------|-------|---|-------|---|------|-------|------|-------|
| trans-DCCA (trans-3-(2,2-dichlorovinyl)-2,2-dimethylcyclopropane-1-carboxylic acid) | Urine | µg/L | 2 | <     | <    | <    | 1.35   | 1.32  | 1.37  |   |       |   |      |       |      |       |
| <b>UV filters</b>                                                                   |       |      |   |       |      |      |        |       |       |   |       |   |      |       |      |       |
| 4-HBP (4-hydroxy-benzophenone)                                                      | Urine | µg/L | 3 | <     | <    | <    | 1.83   | 0.43  | 1.83  | 1 | <     |   |      | 1.07  |      |       |
| 4-HBP (4-hydroxy-benzophenone)                                                      | Blood | µg/L | 2 | 0.48  | 0.33 | 0.62 | 1.36   | 1.34  | 1.38  |   |       |   |      |       |      |       |
| 4-MBP (4-methyl-benzophenone)                                                       | Urine | µg/L | 3 | <     | <    | <    | <      | <     | <     | 1 | <     |   |      | <     |      |       |
| 4-MBP (4-methyl-benzophenone)                                                       | Blood | µg/L | 2 | <     | <    | 0.52 | 1.85   | 0.93  | 2.76  |   |       |   |      |       |      |       |
| BP (Benzophenone)                                                                   | Urine | µg/L | 3 | <     | <    | <    | 7.08   | 7.00  | 11.84 | 1 | <     |   |      | 6.67  |      |       |
| BP-1 (Benzophenone 1)                                                               | Urine | µg/L | 4 | 0.65  | <    | 0.97 | 13.98  | 8.21  | 71.73 | 2 | <     | < | 0.85 | 12.18 | 3.05 | 21.31 |
| BP-1 (Benzophenone 1)                                                               | Blood | µg/L | 2 | <     | <    | <    | <      | <     | 0.71  |   |       |   |      |       |      |       |
| BP-2 (Benzophenone 2)                                                               | Urine | µg/L | 3 | <     | <    | <    | <      | <     | 0.66  | 1 | <     |   |      | <     |      |       |
| BP-2 (Benzophenone 2)                                                               | Blood | µg/L | 2 | <     | <    | <    | <      | <     | <     |   |       |   |      |       |      |       |
| BP-3 (Benzophenone 3)                                                               | Urine | µg/L | 6 | 3.23  | <    | 6.62 | 188.8  | 20.27 | 538.7 | 4 | 2.51  | < | 3.21 | 42.41 | 9.70 | 69.56 |
| BP-3 (Benzophenone 3)                                                               | Blood | µg/L | 2 | 0.16  | 0.16 | 0.17 | 3.67   | 0.63  | 6.71  |   |       |   |      |       |      |       |
| BP-7 (5-chloro-2-hydroxybenzophenone)                                               | Urine | µg/L | 3 | <     | <    | <    | <      | <     | 2.23  | 1 | <     |   |      | <     |      |       |
| BP-7 (5-chloro-2-hydroxybenzophenone)                                               | Blood | µg/L | 2 | <     | <    | <    | <      | <     | <     |   |       |   |      |       |      |       |
| <b>Aprotic solvents</b>                                                             |       |      |   |       |      |      |        |       |       |   |       |   |      |       |      |       |
| 2-HESI (2-hydroxy-N-ethylsuccinimide)                                               | Urine | µg/L | 1 | 6.45  |      |      | 134.0  |       |       | 1 | 4.30  |   |      | 66.90 |      |       |
| 2-HMSI (2-hydroxy-N-methylsuccinimide)                                              | Urine | µg/L | 1 | 44.60 |      |      | 105.9  |       |       | 1 | 42.45 |   |      | 99.35 |      |       |
| 5-HNEP (5-hydroxy-N-ethyl-2-pyrrolidone)                                            | Urine | µg/L | 1 | <     |      |      | 142.2  |       |       | 1 | <     |   |      | 54.43 |      |       |
| 5-HNMP (5-hydroxy-N-methyl-2-pyrrolidone)                                           | Urine | µg/L | 1 | 55.90 |      |      | 169.0  |       |       | 1 | 54.93 |   |      | 181.2 |      |       |
| <b>Acrylamide</b>                                                                   |       |      |   |       |      |      |        |       |       |   |       |   |      |       |      |       |
| AAMA (N-Acetyl-S-(2-carbamoyl-ethyl)cysteine)                                       | Urine | µg/L | 1 | 78.7  |      |      | 283.4  |       |       | 1 | 63.75 |   |      | 204.5 |      |       |
| GAMA (N-Acetyl-S-(2-carbamoyl-2-hydroxyethyl)cysteine)                              | Urine | µg/L | 1 | 15.00 |      |      | 40.70  |       |       | 1 | 15.05 |   |      | 38.57 |      |       |
| <b>Anilines and MOCA</b>                                                            |       |      |   |       |      |      |        |       |       |   |       |   |      |       |      |       |
| NA4AP (N-acetyl-4-aminophenol, paracetamol)                                         | Urine | µg/L | 1 | 120.3 |      |      | 185779 |       |       | 1 | 27.01 |   |      | 7494  |      |       |

<sup>a</sup> determined as total arsenic minus arsenobetaine



**Table S2.** Specific queries used starting from the HBM4EU-Aggregated dataset to derive the Generic Chemical Mixtures for the adults and children populations

|                                        |                                                                                                                                                                                                                                                                                                                                                                                                                                                                                                                                                                                                                                                                                                                                                                                                                                                                                              |
|----------------------------------------|----------------------------------------------------------------------------------------------------------------------------------------------------------------------------------------------------------------------------------------------------------------------------------------------------------------------------------------------------------------------------------------------------------------------------------------------------------------------------------------------------------------------------------------------------------------------------------------------------------------------------------------------------------------------------------------------------------------------------------------------------------------------------------------------------------------------------------------------------------------------------------------------|
| Step 1: filtering data collections     | Removing datasets corresponding to “occupational exposure” and “hotspots”. All other study types, including “clinical” cohorts and “pregnant women” were kept as representative of the general population exposure scenarios.                                                                                                                                                                                                                                                                                                                                                                                                                                                                                                                                                                                                                                                                |
| Step 2: data extraction by age groups  | Extracting data for two age categories: adults and children. For the GCM-adult, age category “children” and “Infants” were excluded, keeping only population age groups of 12 years and above, including the “Elderly > 60” age category. For the GCM-children only age categories “children” were kept. Data are presented for groups of more than 50 individuals for personal data protection. The extraction was therefore done preferentially using statistics from non-stratified data to minimise the chance of drop out of data due to lower sample size for further stratifications by single age groups. Data collections reporting statistics for children and adults groups together could not be used directly. They were recovered from single age groups statistics (single stratification), by calculating the mean value across age groups belonging to children and adults. |
| Step 3: removing data older than 2007  | Eliminating data for samples taken before 2007. The threshold was a compromise between the need to keep the majority of data available and the need to represent a recent exposure scenario.                                                                                                                                                                                                                                                                                                                                                                                                                                                                                                                                                                                                                                                                                                 |
| Step 4: selecting relevant matrices    | Keeping only measurements from blood (µg/L and µg/g lipid) and urine (µg/L and µg/g creatinine) separately, since HBM HBGVs are available for these types of matrices.                                                                                                                                                                                                                                                                                                                                                                                                                                                                                                                                                                                                                                                                                                                       |
| Step 5: geographical scope             | Excluding datasets from non-EU/European Economic Area countries.                                                                                                                                                                                                                                                                                                                                                                                                                                                                                                                                                                                                                                                                                                                                                                                                                             |
| Step 6: processing of non- detects     | Where P50 and P95 values were below the limit of detection (LOD) or limit of quantification (LOQ), percentiles were set to zero, included in the subsequent statistical processing and eventually flagged as non-detects (“<”).                                                                                                                                                                                                                                                                                                                                                                                                                                                                                                                                                                                                                                                              |
| Step 7: derivation of generic chemical | For each biomarker (chemical or metabolite) the median of all P50 and all P95 records reported across all studies was calculated. The resulting two lists of chemicals together with their median P50 and P95 concentration values for adults and children constitute the generic chemical mixtures (GCMs, Table S2). These filtered datasets were taken forward to the combined risk analysis.                                                                                                                                                                                                                                                                                                                                                                                                                                                                                              |

**Table S3.** Human biomonitoring (HBM) health based guidance values (HBGVs) collected from the literature for chemicals (or group of chemicals) present in the generic chemical mixtures (GCMs). Information on toxicological effects is reported for the critical endpoint together with the specific type of HBM HBGV used: biomonitoring equivalent (BE), HBM-I from the German HBM Commission, HBM-GV from HBM4EU, and biomonitoring guidance value (BGV) by [1].

| Substance               | Metabolite biomarker                                            | HBM-HBGV grouping                                                 | HBM-HBGV value | Matrix | Population group    | Critical toxicological effect (target organ/system)                                     | Specific type of HBM-HBGV                                                                 | Source |
|-------------------------|-----------------------------------------------------------------|-------------------------------------------------------------------|----------------|--------|---------------------|-----------------------------------------------------------------------------------------|-------------------------------------------------------------------------------------------|--------|
| Arsenic, inorganic      | Inorganic arsenic, monomethylated arsenic, dimethylated arsenic | $\Sigma(\text{As(III)} + \text{As(V)} + \text{DMA} + \text{MMA})$ | 6.4 µg/L       | Urine  | general population  | hyperpigmentation, keratosis, vascular complications and dermal effects (skin)          | BE, consistent with US EPA reference dose (RfD)                                           | [2,3]  |
| Cadmium                 |                                                                 |                                                                   | 1 µg/g crt     | Urine  | Adults (>50 years)  | kidney damage leading to proteinuria (kidney)                                           | HBM-GV corresponding to EFSA calculations from a meta-analysis of epidemiological studies | [4]    |
| Mercury                 |                                                                 | single                                                            | 7 µg/L         | Urine  | children and adults | Neurological deficits (nervous system)                                                  | HBM-I, derived from epidemiological studies                                               | [5]    |
| Diethyl Phthalate (DEP) | Mono-ethyl phthalate (MEP)                                      | single                                                            | 18 mg/L        | Urine  | general population  | decreased growth rate, food consumption and altered organ weights in rats (unspecified) | BE, consistent with US EPA RfD                                                            | [3,6]  |

|                                   |                                                  |                              |                        |       |                    |                                                                                                                                                                                                                  |                                                                                                                      |     |
|-----------------------------------|--------------------------------------------------|------------------------------|------------------------|-------|--------------------|------------------------------------------------------------------------------------------------------------------------------------------------------------------------------------------------------------------|----------------------------------------------------------------------------------------------------------------------|-----|
| Butylbenzyl phthalate (BBzP)      | Mono-benzyl phthalate (MBzP)                     | single                       | 3 mg/L<br>2 mg/L       | Urine | Adults<br>Children | After <i>in utero</i> exposure: suppression of foetal testicular testosterone production; reduced serum testosterone and reduced epididymal sperm count and motility in F1 adult rats (male reproductive system) | HBM-GV (HBM4EU) derived from animal points of departure (LO(A)EL)s                                                   | [7] |
| Di-n-butyl phthalate (DBP)        | Monobutyl phthalate (MnBP)                       | single                       | 0.19 mg/L<br>0.12 mg/L | Urine | Adults<br>Children | Loss of germ cell development and mammary gland changes in rats (male reproductive system)                                                                                                                       | HBM-GV (HBM4EU), consistent with ECHA DNEL                                                                           | [7] |
| Di-iso-butyl phthalate (DiBP)     | Monoisobutyl phthalate (MiBP)                    | single                       | 0.23 mg/L<br>0.16 mg/L | Urine | Adults<br>Children | Delayed germ cell development and male mammary gland changes (male reproductive system)                                                                                                                          | HBM-GV (HBM4EU), derived from animal points of departure DNEL (read across from DBP based on 20% potency difference) | [7] |
| Di(2-ethylhexyl) phthalate (DEHP) | mono(2-ethyl-5-hydroxyhexyl) phthalate (OH-MEHP) | $\Sigma$ (OH-MEHP, oxo-MEHP) | 0.5 mg/L<br>0.34 mg/L  | Urine | Adults<br>Children | Adverse effect on testicular development in rats                                                                                                                                                                 | HBM-GV (HBM4EU), consistent                                                                                          | [7] |

|                                        |                                                                          |                                       |                       |       |                    |                                        |                                                                 |     |
|----------------------------------------|--------------------------------------------------------------------------|---------------------------------------|-----------------------|-------|--------------------|----------------------------------------|-----------------------------------------------------------------|-----|
|                                        | Mono(2-ethyl-5-oxo-hexyl) phthalate (oxo-MEHP)                           |                                       |                       |       |                    | (male reproductive system)             | with EFSA tolerable daily intake (TDI)                          |     |
| di(2-ethylhexyl) terephthalate (DEHTP) | 1-mono-(2-ethyl-5-carboxyl-pentyl) benzene-1,4-dicarboxylate (5cx-MEPTP) | single                                | 2.8 mg/L<br>1.8 mg/L  | Urine | adults<br>children |                                        | HBM-GV (HBM4EU), derived from toxicity reference value (BMDL10) | [5] |
| Di-isononyl phthalate (DiNP)           | 7-Carboxy-(mono-methyl- heptyl) phthalate (cx-MiNP)                      | $\Sigma$ (cx-MiNP, OH-MiNP, oxo-MiNP) | 1.8 mg/L              | Urine | general population | Spongiosis hepatitis in rats (liver)   | BE, consistent with EFSA TDI                                    | [8] |
|                                        | 7-OH-(Mono-methyl-octyl) phthalate (OH-MiNP)                             |                                       |                       |       |                    |                                        |                                                                 |     |
|                                        | 7-Oxo-(Mono-methyl-octyl) phthalate (oxo-MiNP)                           |                                       |                       |       |                    |                                        |                                                                 |     |
| Di(2-propylheptyl) phthalate (DPHP)    | 6-OH-Mono-propyl-heptyl phthalate (OH-MPHP)                              | $\Sigma$ (OH-MPHP, oxo-MPHP)          | 0.5 mg/L<br>0.33 mg/L | Urine | Adults<br>Children | Effects on thyroid and pituitary gland | HBM-GV (HBM4EU), derived from oral reference dose [9]           | [7] |
|                                        | 6-Oxo-Mono-propyl-heptyl phthalate (oxo-MPHP)                            |                                       |                       |       |                    |                                        |                                                                 |     |

|                                                            |                                                                                    |                               |                      |                      |                        |                                                                                                                                                                                                                                                                                                    |                                            |        |
|------------------------------------------------------------|------------------------------------------------------------------------------------|-------------------------------|----------------------|----------------------|------------------------|----------------------------------------------------------------------------------------------------------------------------------------------------------------------------------------------------------------------------------------------------------------------------------------------------|--------------------------------------------|--------|
| 1,2-Cyclohexane dicarboxylic acid diisononyl ester (DINCH) | cyclohexane-1,2-dicarboxylate-mono-(7-hydroxy-4-methyl)octyl ester (OH-MINCH)      | $\Sigma$ (OH-MINCH, cx-MINCH) | 4.5 mg/L<br>3.0 mg/L | Urine                | Adults<br><br>Children | Nephrototoxicity.<br><br>Similar TDIs for elevated kidney weight and thyroid hypertrophy and hyperplasia<br><br>(kidney, thyroid)                                                                                                                                                                  | HBM-GV (HBM4EU), consistent with EFSA TDI  | [7]    |
|                                                            | cyclohexane-1,2-dicarboxylate-mono-(7-carboxylate-4-methyl)heptyl ester (cx-MINCH) |                               |                      |                      |                        |                                                                                                                                                                                                                                                                                                    |                                            |        |
| Perfluorooctanoic acid (PFOA)                              |                                                                                    | single                        | 2 µg/L               | Blood (blood plasma) | general population     | fertility and pregnancy, weights of new-borns at birth (reproductive system), lipid metabolism, consis immunity, sex hormones and age at puberty/ menarche, onset of menopause thyroid hormones, as well as uric acid metabolism signalling impaired kidney function. (several organs and systems) | HBM-I derived from epidemiological studies | [10]   |
| Perfluorooctanesulfonic acid (PFOS)                        |                                                                                    | single                        | 5 µg/L               | Blood (blood plasma) | general population     |                                                                                                                                                                                                                                                                                                    | HBM-I derived from epidemiological studies | [10]   |
| 2,2',4,4',5-pentabromodiphenylether (BDE99)                |                                                                                    | single                        | 0.52 µg/g lipid      | Blood                | general population     | Neurobehavioural effects, unclear MoA. Changes in locomotion, rearing and total activity in                                                                                                                                                                                                        | BE, consistent with US EPA RfD             | [3,11] |

|                              |                                           |                   |                      |       |                    |                                                                                                                                                                                                   |                                                                                                            |         |
|------------------------------|-------------------------------------------|-------------------|----------------------|-------|--------------------|---------------------------------------------------------------------------------------------------------------------------------------------------------------------------------------------------|------------------------------------------------------------------------------------------------------------|---------|
|                              |                                           |                   |                      |       |                    | mice (nervous system)                                                                                                                                                                             |                                                                                                            |         |
| Bisphenol A (BPA)            |                                           | single            | 230 µg/L<br>135 µg/L | Urine | Adults<br>Children | Increase in kidney weight                                                                                                                                                                         | HBM-GV (HBM4EU), consistent with EFSA TDI <sup>a</sup>                                                     | [12]    |
| Pyrethroid insecticides      | 3-phenoxybenzoic acid (3-PBA)             | single            | 87 µg/L              | Urine | general population | Increase in the sodium permeability of the nerve membrane that underlies the nerve action potential.<br><br>Intermediate key events unclear. Leading to excitatory neurotoxicity (nervous system) | BE, derived from regulatory HBGV for the various pyrethroids (various sources)                             | [13,14] |
| Chlorpyrifos                 | 3,5,6-trichloro-2-pyridinol (TCPy)        | single            | 2.1 mg/L             | Urine | adults             | Cholinesterase inhibition leading to hyperactivity of nervous system leading to range of apical effects on multiple tissues (nervous system)                                                      | Biomonitoring guidance value (BGV) derived from human in vitro and animal points of departure <sup>b</sup> | [1]     |
| N-methyl-2-pyrrolidone (NMP) | 5-hydroxy-N-methyl-2-pyrrolidone (5-HNMP) | Σ(5-HNMP, 2-HMSI) | 15 mg/L              | Urine | Adults             |                                                                                                                                                                                                   | HBM-GV (HBM4EU),                                                                                           | [15]    |

|                             |                                          |                           |         |       |          |                                    |                                                                 |      |
|-----------------------------|------------------------------------------|---------------------------|---------|-------|----------|------------------------------------|-----------------------------------------------------------------|------|
|                             | 2-hydroxy-N-methylsuccinimide (2-HMSI)   |                           | 10 mg/L |       | Children | Maternal and developmental effects | derived from animal point of departure (NOAEL)                  |      |
| N-ethyl-2-pyrrolidone (NEP) | 5-hydroxy-N-ethyl-2-pyrrolidone (5-HNEP) | $\Sigma$ (5-HNEP, 2-HESI) | 15 mg/L | Urine | Adults   | Maternal and developmental effects | HBM-GV (HBM4EU), derived from animal point of departure (NOAEL) | [15] |
|                             | 2-hydroxy-N-ethylsuccinimide (2-HESI)    |                           | 10 mg/L |       | Children |                                    |                                                                 |      |

<sup>a</sup> a proposal for lowering the Tolerable Daily Intake has been published by EFSA

<sup>b</sup> The BGV represents the urinary TCPy concentration “predicted to occur in sensitive individuals exposed to an oral acute dose that results in 10% red blood cell (RBC) cholinesterase (ChE) inhibition (the early marker of ChE inhibition in the peripheral and central nervous systems)” [1].

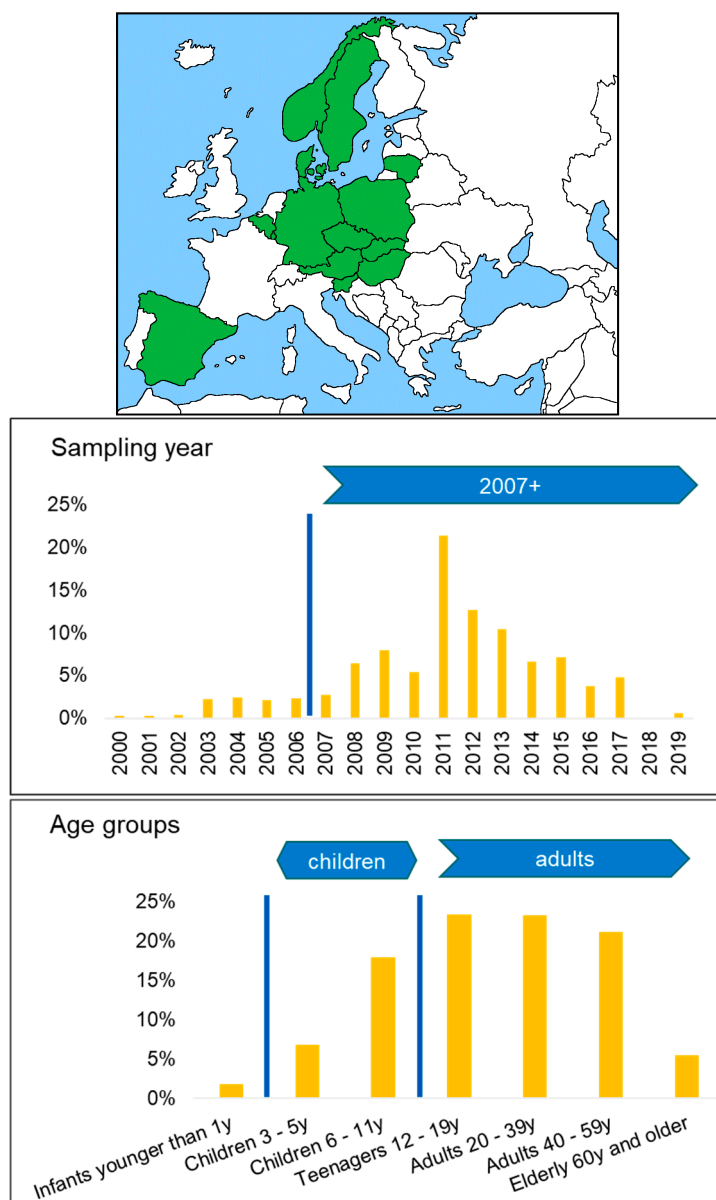

**Figure S1.** Overview of the spatial, temporal and population age groups scope of the generic chemical mixture (GCM): countries represented in the adults GCM (the children GCM has the same coverage excluding Lithuania), sampling years and age groups



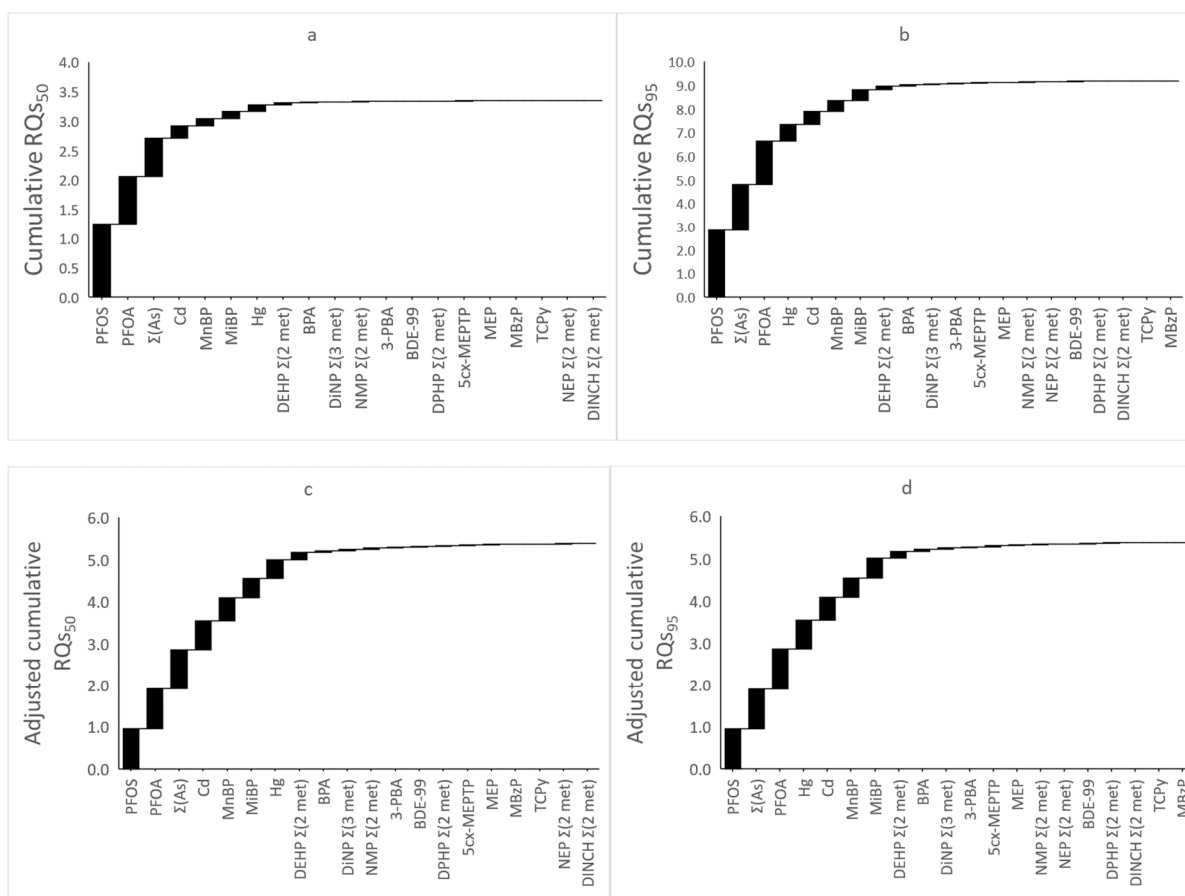

**Figure S2.** Cumulative risk quotients for the **adult mixtures** at **(a)** the median (RQ<sub>50</sub>) and **(b)** the worst case (RQ<sub>95</sub>) scenarios, and corresponding adjusted cumulative risk quotients, assuming successful single substance risk management (replacing individual RQs > 1 with RQ = 0.95) at **(c)** median and **(d)** worst case scenarios.

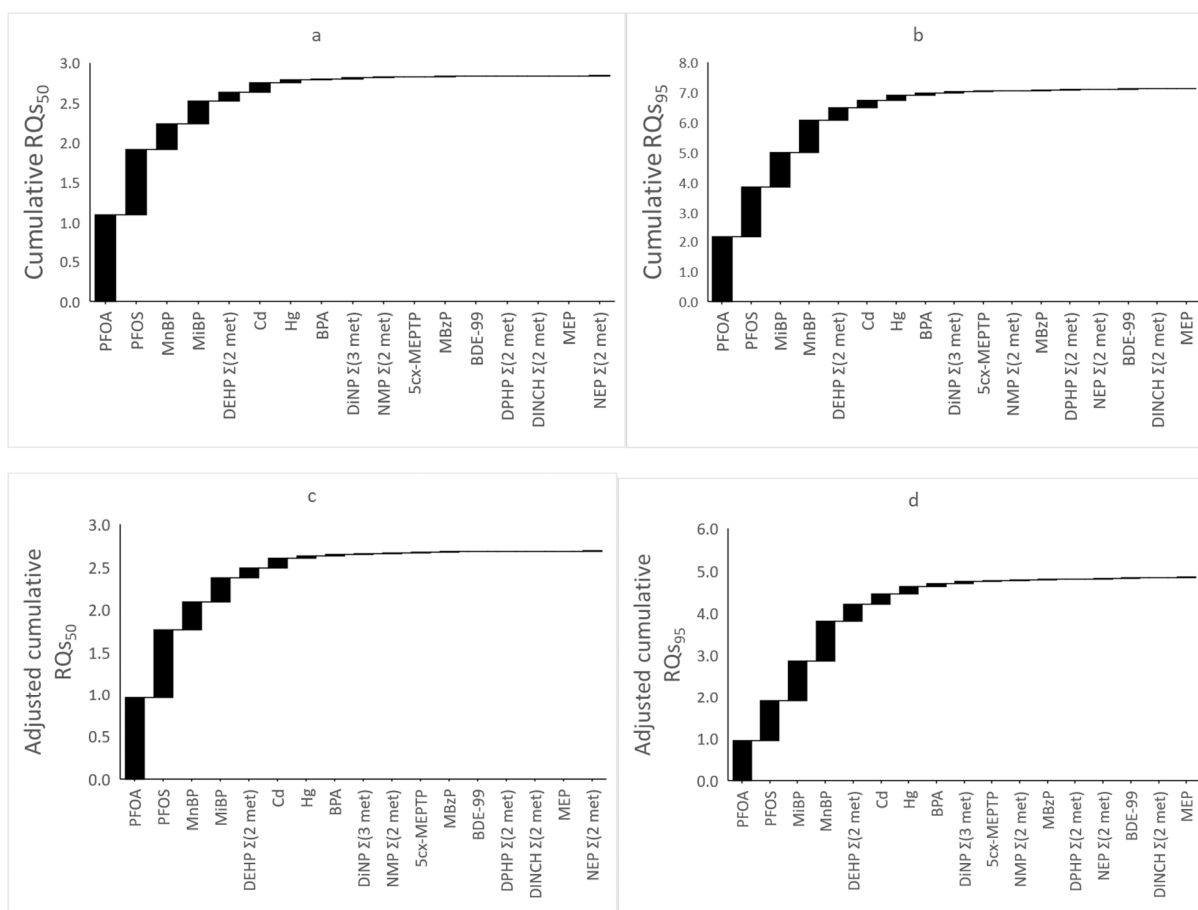

**Figure S3.** Cumulative risk quotients for the **children mixtures** at (a) the median (RQ<sub>S50</sub>) and (b) the worst case (RQ<sub>S95</sub>) scenarios, and corresponding adjusted cumulative risk quotients, assuming successful single substance risk management (replacing individual RQs > 1 with RQ = 0.95) at (c) median and (d) worst case scenarios.

## References

1. Arnold, S. M., Morriss, A., Velovitch, J., Juberg, D., Burns, C. J., Bartels, M., Aggarwal, M., Poet, T., Hays, S., & Price, P. (2015). Derivation of human biomonitoring guidance values for chlorpyrifos using a physiologically based pharmacokinetic and pharmacodynamic model of cholinesterase inhibition. *Regulatory Toxicology and Pharmacology*, 71(2), 235–243. <https://doi.org/10.1016/j.yrtph.2014.12.013>.
2. Hays, S. M., Aylward, L. L., Gagné, M., Nong, A., & Krishnan, K. (2010). Biomonitoring Equivalents for inorganic arsenic. *Regulatory Toxicology and Pharmacology*, 58(1), 1–9. <https://doi.org/10.1016/j.yrtph.2010.06.002>.
3. WHO. (2015). Human biomonitoring: facts and figures. *World Health Organization*, 1–88. [http://www.euro.who.int/\\_\\_data/assets/pdf\\_file/0020/276311/Human-biomonitoring-facts-figures-en.pdf](http://www.euro.who.int/__data/assets/pdf_file/0020/276311/Human-biomonitoring-facts-figures-en.pdf).
4. Lamkarkach, F., Ougier, E., Garnier, R., Viau, C., Kolossa-Gehring, M., Lange, R., & Apel, P. (2021). Human biomonitoring initiative (HBM4EU): Human biomonitoring guidance values (HBM-GVs) derived for cadmium and its compounds. *Environment International*, 147(December 2020), 106337. <https://doi.org/10.1016/j.envint.2020.106337>.
5. Apel, P., Angerer, J., Wilhelm, M., & Kolossa-Gehring, M. (2017). New HBM values for emerging substances, inventory of reference and HBM values in force, and working principles of the German Human Biomonitoring Commission. *International Journal of Hygiene and Environmental Health*, 220(2), 152–166. <https://doi.org/10.1016/j.ijheh.2016.09.007>.
6. Aylward, L. L., Hays, S. M., Gagné, M., & Krishnan, K. (2009). Derivation of Biomonitoring Equivalents for di-n-butyl phthalate (DBP), benzylbutyl phthalate (BzBP), and diethyl phthalate (DEP). *Regulatory Toxicology and Pharmacology*, 55(3), 259–267. <https://doi.org/10.1016/j.yrtph.2009.09.003>.
7. Lange, R., Apel, P., Rousselle, C., Charles, S., Sissoko, F., Kolossa-Gehring, M., & Ougier, E. (2021). The European Human Biomonitoring Initiative (HBM4EU): Human biomonitoring guidance values for selected phthalates and a substitute plasticizer. *International Journal of Hygiene and Environmental Health*, 234, 113722. <https://doi.org/10.1016/j.ijheh.2021.113722>.
8. Hays, S. M., Aylward, L. L., Kirman, C. R., Krishnan, K., & Nong, A. (2011). Biomonitoring Equivalents for di-isononyl phthalate (DINP). *Regulatory Toxicology and Pharmacology*, 60(2), 181–188. <https://doi.org/10.1016/j.yrtph.2011.03.013>.
9. Bhat, V. S., Durham, J. L., & English, J. C. (2014). Derivation of an oral reference dose (RfD) for the plasticizer, di-(2-propylheptyl)phthalate (Palatinol® 10-P). *Regulatory Toxicology and Pharmacology*, 70(1), 65–74. <https://doi.org/10.1016/j.yrtph.2014.06.002>.
10. Hölzer, J., Lilienthal, H., & Schümann, M. (2021). Human Biomonitoring (HBM)-I values for perfluorooctanoic acid (PFOA) and perfluorooctane sulfonic acid (PFOS) - Description, derivation and discussion. *Regulatory Toxicology and Pharmacology*, 121(December 2020). <https://doi.org/10.1016/j.yrtph.2021.104862>.
11. Krishnan, K., Adamou, T., Aylward, L. L., Hays, S. M., Kirman, C. R., & Nong, A. (2011). Biomonitoring Equivalents for 2,2',4,4',5-pentabromodiphenylether (PBDE-99). *Regulatory Toxicology and Pharmacology*, 60(2), 165–171. <https://doi.org/10.1016/j.yrtph.2011.03.011>.
12. Ougier, E., Zeman, F., Antignac, J. P., Rousselle, C., Lange, R., Kolossa-Gehring, M., & Apel, P. (2021). Human biomonitoring initiative (HBM4EU): Human biomonitoring guidance values (HBM-GVs) derived for bisphenol A. *Environment International*, 154, 106563. <https://doi.org/10.1016/j.envint.2021.106563>.
13. Aylward, L. L., Irwin, K., St-Amand, A., Nong, A., & Hays, S. M. (2018). Screening-level Biomonitoring Equivalents for tiered interpretation of urinary 3-phenoxybenzoic acid (3-PBA) in a risk assessment context. *Regulatory Toxicology and Pharmacology*, 92(October 2017), 29–38. <https://doi.org/10.1016/j.yrtph.2017.11.002>.
14. Faure, S., Noisel, N., Werry, K., Karthikeyan, S., Aylward, L. L., & St-Amand, A. (2020). Evaluation of human biomonitoring data in a health risk based context: An updated analysis of population level data from the Canadian Health Measures Survey. *International Journal of Hygiene and Environmental Health*, 223(1), 267–280. <https://doi.org/10.1016/j.ijheh.2019.07.009>.

15. David, M., Gerofke, A., Lange, R., Kolossa-Gehring, M., & Apel, P. (2021). The European Human Biomonitoring Initiative (HBM4EU): Human biomonitoring guidance values (HBM-GVs) for the aprotic solvents N-methyl-2-pyrrolidone (NMP) and N-ethyl-2-pyrrolidone (NEP). *International Journal of Hygiene and Environmental Health*, 238(October), 113856. <https://doi.org/10.1016/j.ijheh.2021.113856>.
